# Supplementary material for: Microdroplet extraction assisted ultrasensitive Raman detection in complex oil
Source: Royal Society of Chemistry journal article supplement (doi:10.1039/d1lc00169h), 2021-01-01
Supplement: d1lc00169h1.pdf [file d1lc00169h1.pdf]

## Supporting Information

### Microdroplet Extraction Assisted Ultrasensitive Raman Detection in Complex Oil

Lingjun Zhang,<sup>‡a</sup> Jianfeng Sun,<sup>‡a</sup> Hong He,<sup>a</sup> Yingzhou Huang,<sup>\*a</sup> Haiyang Shi<sup>\*c</sup> and Weigen Chen<sup>b</sup>

---

<sup>a</sup> State Key Laboratory of Coal Mine Disaster Dynamics and Control, Chongqing Key Laboratory of Soft Condensed Matter Physics and Smart Materials, College of Physics, Chongqing University, Chongqing, 400044, China. E-mail: yzhuang@cqu.edu.cn (Y. Huang)

<sup>b</sup> State Key Laboratory of Power Transmission Equipment & System Security and New Technology, Chongqing University, Chongqing 400044, China.

<sup>c</sup> School of Mechatronics and Vehicle Engineering, Chongqing Jiaotong University Chongqing 400074, China. E-mail: shihaiyang@cqu.edu.cn (H. Shi).

† Electronic supplementary information (ESI) available. See DOI: xxx

‡ These authors contributed equally to this work.

#### List of Contents

**Fig. S1** (a) The geometry of the microfluidic channel. The serpentine channel and the microdroplet Raman detection channel were 150 and 800  $\mu\text{m}$  wide, respectively. The channel height was 100  $\mu\text{m}$ . (b) Schematic of experimental setup of fluorescence measurements, comprising the microfluidic chip, fluorescence microscope and two syringe pumps.

**Fig. S2** A schematic of a home-built Raman spectrometer used for microdroplet interrogation.

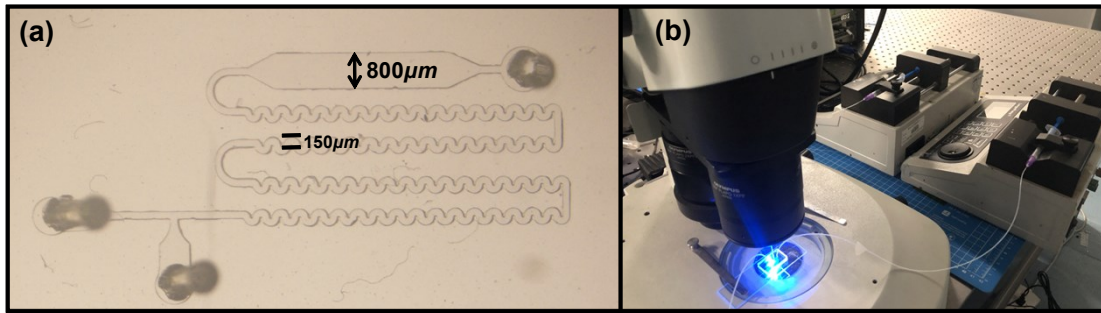

**Fig. S1** (a) The geometry of the microfluidic channel. The serpentine channel and the microdroplet Raman detection channel were 150 and 800  $\mu\text{m}$  wide, respectively. The channel height was 100  $\mu\text{m}$ . (b) Schematic of experimental setup of fluorescence measurements, comprising the microfluidic chip, fluorescence microscope and two syringe pumps.

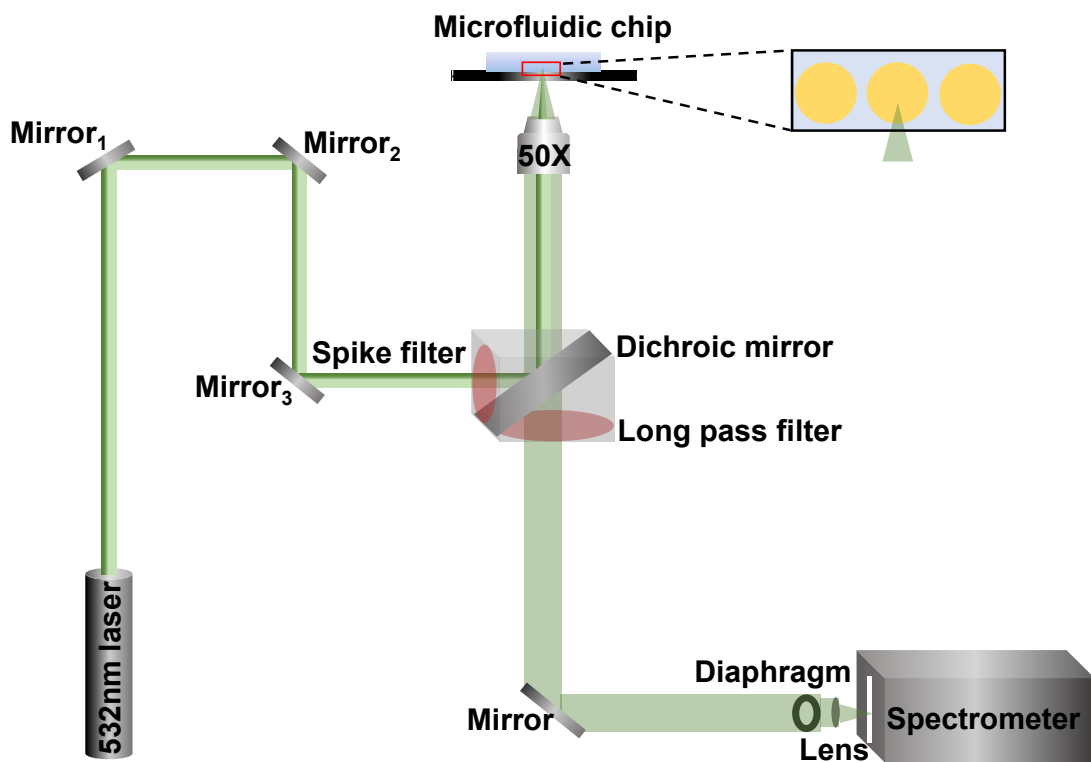

**Fig. S2** A schematic of a home-built Raman spectrometer used for microdroplet interrogation.

**Table S1. Sensitivity analysis between HPLC and microdroplet Raman.**

| Concentration of<br>furfural in<br>samples (ppm) | HPLC                         |                  | Microdroplet extraction assisted real-time Raman<br>spectroscopy microfluidic chip |      |      |                  |                                             |
|--------------------------------------------------|------------------------------|------------------|------------------------------------------------------------------------------------|------|------|------------------|---------------------------------------------|
|                                                  | Detection<br>result<br>(ppm) | Deviation<br>(%) | Detection result<br>(ppm)                                                          |      |      | Deviation<br>(%) | Coefficient of<br>standard<br>deviation (%) |
|                                                  |                              |                  | 1                                                                                  | 2    | 3    |                  |                                             |
| 1.00                                             | 1.07                         | 7.00             | 1.01                                                                               | 0.95 | 1.07 | 4.72             | 5.15                                        |
| 2.00                                             | 1.92                         | 4.00             | 1.77                                                                               | 2.20 | 1.96 | 7.80             | 8.83                                        |
| 3.30                                             | 3.48                         | 5.45             | 3.32                                                                               | 3.07 | 3.59 | 5.37             | 6.34                                        |
